# Supplementary material
Source: PubMed Central journal article supplement (PMC7363564)
Supplement: NIHMS1600632-supplement-Supplement_1.pdf [file NIHMS1600632-supplement-Supplement_1.pdf]

## **SUPPLEMENTAL MATERIAL**

### **Additional Details about Methods**

#### *Identifying Beneficiaries with ADRD*

The Medicare Master Beneficiary Summary File (MBSF) chronic conditions segment includes beneficiary data for each of the 27 defined Chronic Conditions Warehouse (CCW) chronic conditions. Specifically, we identified AL residents with ADRD as those with a flag for Alzheimer's Disease, Related Disorders, or Senile Dementia. To have this flag, beneficiaries must have at least one inpatient, skilled nursing facility, home health, Part B institutional, or Part B non-institutional (carrier) claim with a related code in any position during the 3-year look-back period.

#### *Identifying a Cohort of Medicare Beneficiaries Residing in AL*

We identified Medicare Part B claims in the Carrier File that had a Place of Service code #13 and/or Current Procedural Terminology (CPT) codes 99324-99337, indicating that care was delivered in an AL setting. We used the Outcome and Assessment Information Set (OASIS) to identify beneficiaries with a start of care assessment that had a living arrangement code indicating "congregate living situation with around-the-clock assistance." The Part B Claims/Carrier data and the OASIS were linked to a ZIP code History File (ZHF) to obtain beneficiaries' 9-digit ZIP codes on the claim and/or OASIS assessment date(s) indicating services were rendered in an AL setting. The MBSF was linked to the ZHF to obtain beneficiaries' residential ZIP codes. The ZHF was created by integrating the MBSF and the Enterprise Cross Reference File, which contains beneficiaries' 9-digit ZIP code as of their change of residence date. We then compiled the 9-digit ZIP codes of beneficiaries whose first seven digits of their ZIP codes matched to those of an AL. To that list, we added the 9-digit ZIP codes of ALs and created a yearly finder file of 52,493 validated 9-digit ZIP codes associated with 11,916 ALs (many large AL campuses have more than one 9-digit ZIP code). Using this finder file, we searched beneficiaries' residential ZIP codes to identify Medicare beneficiaries residing in large AL settings with a validated 9-digit ZIP code pertaining to an AL on December 31, 2016.

**Supplemental Tables with the observed and adjusted rates presented in the figures**

**Supplementary Table S1.** Unadjusted rate of ADRD by state (arrayed from largest to smallest share of assisted living residents with ADRD)

| State | Number of assisted living residents with ADRD | Total number of assisted living residents | Proportion of assisted living residents with ADRD (%) | Proportion of residents in the community with ADRD (%) |
|-------|-----------------------------------------------|-------------------------------------------|-------------------------------------------------------|--------------------------------------------------------|
| Total | 88,867                                        | 293,336                                   | 30.3                                                  | 6.1                                                    |
| NC    | 3,831                                         | 8,109                                     | 47.2                                                  | 6.2                                                    |
| KS    | 903                                           | 2,462                                     | 36.7                                                  | 5.9                                                    |
| WV    | 154                                           | 420                                       | 36.7                                                  | 5.8                                                    |
| NY    | 5,816                                         | 16,295                                    | 35.7                                                  | 6.5                                                    |
| FL    | 10,435                                        | 30,211                                    | 34.5                                                  | 7.5                                                    |
| TX    | 5,069                                         | 14,758                                    | 34.4                                                  | 7.3                                                    |
| NV    | 415                                           | 1,214                                     | 34.2                                                  | 5.6                                                    |
| NJ    | 3,190                                         | 9,496                                     | 33.6                                                  | 6.8                                                    |
| UT    | 442                                           | 1,337                                     | 33.1                                                  | 5.6                                                    |
| MS    | 539                                           | 1,643                                     | 32.8                                                  | 6.2                                                    |
| TN    | 1,504                                         | 4,595                                     | 32.7                                                  | 6.1                                                    |
| GA    | 1,744                                         | 5,375                                     | 32.5                                                  | 6.5                                                    |
| IN    | 1,107                                         | 3,416                                     | 32.4                                                  | 5.8                                                    |
| AR    | 678                                           | 2,139                                     | 31.7                                                  | 6.6                                                    |
| ME    | 825                                           | 2,640                                     | 31.3                                                  | 5.2                                                    |
| MA    | 2,572                                         | 8,352                                     | 30.8                                                  | 5.6                                                    |
| DE    | 300                                           | 983                                       | 30.5                                                  | 5.9                                                    |
| MD    | 1,997                                         | 6,575                                     | 30.4                                                  | 6.3                                                    |
| IL    | 3,478                                         | 11,487                                    | 30.3                                                  | 6.1                                                    |
| RI    | 371                                           | 1,238                                     | 30.0                                                  | 4.9                                                    |
| VT    | 219                                           | 731                                       | 30.0                                                  | 4.3                                                    |
| LA    | 474                                           | 1,583                                     | 29.9                                                  | 6.5                                                    |
| NM    | 216                                           | 723                                       | 29.9                                                  | 5.3                                                    |
| OH    | 3,293                                         | 11,103                                    | 29.7                                                  | 5.5                                                    |

|    |       |        |      |     |
|----|-------|--------|------|-----|
| MI | 1,583 | 5,364  | 29.5 | 7.2 |
| SC | 1,418 | 4,848  | 29.3 | 5.8 |
| AL | 660   | 2,257  | 29.2 | 6.7 |
| OK | 872   | 2,982  | 29.2 | 6.0 |
| CO | 1,490 | 5,097  | 29.2 | 5.0 |
| WY | 119   | 409    | 29.1 | 4.2 |
| OR | 1,431 | 4,987  | 28.7 | 5.0 |
| VA | 3,090 | 10,874 | 28.4 | 6.0 |
| KY | 676   | 2,391  | 28.3 | 5.6 |
| NH | 574   | 2,032  | 28.3 | 4.8 |
| MT | 334   | 1,202  | 27.8 | 4.6 |
| WI | 2,329 | 8,443  | 27.6 | 5.0 |
| CA | 7,411 | 27,213 | 27.2 | 6.3 |
| AZ | 1,741 | 6,520  | 26.7 | 5.1 |
| NE | 1,127 | 4,244  | 26.6 | 5.1 |
| MO | 1,679 | 6,371  | 26.4 | 5.8 |
| WA | 2,960 | 11,250 | 26.3 | 5.4 |
| ID | 489   | 1,901  | 25.7 | 5.0 |
| CT | 372   | 1,477  | 25.2 | 6.6 |
| PA | 5,227 | 21,013 | 24.9 | 5.4 |
| SD | 287   | 1,178  | 24.4 | 3.8 |
| IA | 1,293 | 5,368  | 24.1 | 4.4 |
| ND | 301   | 1,257  | 24.0 | 4.2 |
| MN | 1,832 | 7,773  | 23.6 | 4.8 |

**Supplementary Table S2.** Adjusted rates of moving into a nursing home among residents with an ADRD diagnosis in assisted living and community (arrayed by absolute difference from largest to smallest)

| State | Number of assisted living residents who moved to a nursing home | Total number of assisted living residents with an ADRD diagnosis | Adjusted percent of assisted living residents who moved to a nursing home | 95% CI       | Number of community residents who moved to a nursing home | Total number of community residents | Adjusted percent of community residents who moved to a nursing home | 95% CI       | Absolute difference in adjusted rates of moving into a nursing home |
|-------|-----------------------------------------------------------------|------------------------------------------------------------------|---------------------------------------------------------------------------|--------------|-----------------------------------------------------------|-------------------------------------|---------------------------------------------------------------------|--------------|---------------------------------------------------------------------|
| Total | 21,151                                                          | 88,867                                                           | 23.8%                                                                     | 23.5%, 24%   | 342,190                                                   | 2,074,420                           | 16.5%                                                               | 16.4%, 16.6% | 7.3%*                                                               |
| DE    | 98                                                              | 300                                                              | 33.6%                                                                     | 28%, 38.7%   | 9,228                                                     | 1,601                               | 17.3%                                                               | 16.6%, 18%   | 16.3%*                                                              |
| ND    | 98                                                              | 301                                                              | 34.9%                                                                     | 29%, 40.5%   | 3,726                                                     | 775                                 | 22.0%                                                               | 20.6%, 23.3% | 12.9%*                                                              |
| CT    | 121                                                             | 372                                                              | 33.5%                                                                     | 28.7%, 37.3% | 28,195                                                    | 6,241                               | 21.3%                                                               | 20.9%, 21.8% | 12.2%*                                                              |
| RI    | 122                                                             | 371                                                              | 33.5%                                                                     | 29%, 38.4%   | 5,208                                                     | 1,168                               | 22.4%                                                               | 21.4%, 23.5% | 11.2%*                                                              |
| KY    | 195                                                             | 676                                                              | 29.3%                                                                     | 25.9%, 32.7% | 32,295                                                    | 6,105                               | 18.3%                                                               | 17.9%, 18.7% | 11.0%*                                                              |
| NY    | 1,575                                                           | 5,816                                                            | 26.1%                                                                     | 25.2%, 27.1% | 123,532                                                   | 19,439                              | 15.3%                                                               | 15.1%, 15.5% | 10.8%*                                                              |
| PA    | 1,527                                                           | 5,225                                                            | 29.3%                                                                     | 28.1%, 30.6% | 74,135                                                    | 14,417                              | 19.0%                                                               | 18.7%, 19.2% | 10.3%*                                                              |
| IL    | 1,016                                                           | 3,481                                                            | 29.0%                                                                     | 27.7%, 30.6% | 89,570                                                    | 17,386                              | 18.9%                                                               | 18.7%, 19.2% | 10.1%*                                                              |
| AR    | 169                                                             | 679                                                              | 25.4%                                                                     | 22.3%, 28.5% | 28,484                                                    | 4,292                               | 15.5%                                                               | 15.1%, 16%   | 9.9%*                                                               |
| CA    | 1,666                                                           | 7,413                                                            | 22.5%                                                                     | 21.6%, 23.4% | 199,239                                                   | 26,193                              | 13.9%                                                               | 13.8%, 14.1% | 8.6%*                                                               |
| IA    | 376                                                             | 1,294                                                            | 30.9%                                                                     | 28.4%, 33.8% | 19,771                                                    | 4,262                               | 22.4%                                                               | 21.8%, 23%   | 8.5%*                                                               |
| FL    | 2,651                                                           | 10,438                                                           | 23.7%                                                                     | 22.9%, 24.3% | 161,341                                                   | 25,738                              | 15.3%                                                               | 15.1%, 15.5% | 8.4%*                                                               |

|    |       |       |       |                 |         |        |       |                 |       |
|----|-------|-------|-------|-----------------|---------|--------|-------|-----------------|-------|
| AL | 155   | 660   | 24.4% | 20.6%,<br>28%   | 38,974  | 6,532  | 16.5% | 16.1%,<br>16.8% | 7.9%* |
| MA | 731   | 2,573 | 28.7% | 26.6%,<br>30.2% | 50,024  | 10,472 | 20.7% | 20.4%,<br>21.1% | 7.9%* |
| CO | 357   | 1,490 | 25.3% | 23%,<br>27.4%   | 23,572  | 3,855  | 17.5% | 16.9%,<br>18%   | 7.8%* |
| MO | 428   | 1,679 | 26.1% | 23.7%,<br>28%   | 42,199  | 7,915  | 18.5% | 18.2%,<br>18.9% | 7.6%* |
| SD | 82    | 287   | 30.4% | 25.3%,<br>37%   | 4,346   | 935    | 22.8% | 21.7%,<br>24.2% | 7.6%* |
| VA | 691   | 3,090 | 23.3% | 21.9%,<br>24.8% | 62,860  | 9,849  | 15.7% | 15.4%,<br>15.9% | 7.6%* |
| TN | 373   | 1,505 | 24.8% | 22.6%,<br>27%   | 45,198  | 8,364  | 17.9% | 17.5%,<br>18.2% | 6.9%* |
| GA | 341   | 1,744 | 20.0% | 18%,<br>21.8%   | 61,278  | 8,059  | 13.2% | 13%,<br>13.5%   | 6.8%* |
| NV | 87    | 415   | 21.0% | 17.7%,<br>24.7% | 15,633  | 2,087  | 14.2% | 13.7%,<br>14.7% | 6.8%* |
| OK | 201   | 872   | 23.3% | 20.6%,<br>26.1% | 31,747  | 5,256  | 16.6% | 16.3%,<br>17%   | 6.7%* |
| NJ | 847   | 3,190 | 25.4% | 23.9%,<br>26.8% | 74,728  | 14,237 | 18.8% | 18.5%,<br>19.1% | 6.6%* |
| LA | 91    | 473   | 19.4% | 15.5%,<br>23%   | 31,845  | 4,152  | 12.9% | 12.5%,<br>13.2% | 6.5%* |
| SC | 291   | 1,416 | 21.3% | 19.4%,<br>23.6% | 38,723  | 5,667  | 14.8% | 14.5%,<br>15.2% | 6.5%* |
| TX | 1,132 | 5,068 | 21.9% | 20.7%,<br>22.9% | 163,350 | 24,537 | 15.5% | 15.4%,<br>15.7% | 6.4%* |
| NE | 280   | 1,126 | 26.1% | 23.3%,<br>28.5% | 13,277  | 2,528  | 20.0% | 19.1%,<br>20.8% | 6.1%* |
| WA | 533   | 2,959 | 18.9% | 17.5%,<br>20.2% | 42,984  | 5,285  | 12.8% | 12.5%,<br>13.1% | 6.1%* |
| OH | 858   | 3,294 | 26.1% | 24.6%,<br>27.4% | 67,225  | 13,989 | 20.2% | 19.9%,<br>20.5% | 5.9%* |
| MI | 364   | 1,583 | 22.7% | 20.5%,<br>24.6% | 82,213  | 14,928 | 17.1% | 16.8%,<br>17.4% | 5.6%* |

|    |     |       |       |                 |        |        |       |                 |       |
|----|-----|-------|-------|-----------------|--------|--------|-------|-----------------|-------|
| MN | 399 | 1,832 | 23.2% | 21.5%,<br>25.2% | 17,486 | 2,875  | 17.6% | 16.9%,<br>18.1% | 5.6%* |
| MD | 423 | 1,998 | 21.9% | 20.2%,<br>23.8% | 51,126 | 8,429  | 16.6% | 16.3%,<br>16.9% | 5.3%* |
| IN | 286 | 1,107 | 25.5% | 23%,<br>27.7%   | 46,139 | 9,682  | 20.5% | 20.1%,<br>20.8% | 5.1%* |
| AZ | 293 | 1,742 | 16.9% | 15.1%,<br>18.4% | 34,179 | 3,979  | 12.1% | 11.7%,<br>12.4% | 4.8%* |
| ID | 83  | 489   | 17.7% | 13.7%,<br>21.3% | 9,217  | 1,157  | 13.0% | 12.3%,<br>13.8% | 4.6%  |
| OR | 212 | 1,430 | 15.4% | 13.6%,<br>17.1% | 20,002 | 2,083  | 10.7% | 10.2%,<br>11.1% | 4.6%* |
| WI | 464 | 2,329 | 20.5% | 19%,<br>21.9%   | 30,008 | 4,722  | 16.0% | 15.6%,<br>16.5% | 4.5%* |
| WY | 27  | 119   | 23.1% | 15.3%,<br>30%   | 3,738  | 664    | 19.2% | 17.9%,<br>20.4% | 3.9%  |
| KS | 225 | 902   | 24.3% | 21.6%,<br>27.1% | 23,009 | 4,744  | 20.8% | 20.3%,<br>21.4% | 3.5%* |
| NC | 691 | 3,828 | 18.4% | 17.1%,<br>19.5% | 72,161 | 11,184 | 15.4% | 15.1%,<br>15.7% | 3.0%* |
| MT | 59  | 334   | 18.7% | 14%,<br>22.8%   | 7,080  | 1,084  | 16.0% | 15%,<br>16.9%   | 2.8%  |
| ME | 186 | 825   | 22.1% | 19.4%,<br>24.9% | 10,982 | 2,193  | 19.4% | 18.7%,<br>20.2% | 2.7%  |
| MS | 91  | 539   | 17.7% | 14.7%,<br>20.7% | 27,356 | 4,216  | 15.2% | 14.7%,<br>15.6% | 2.5%  |
| NH | 98  | 574   | 17.8% | 14.4%,<br>20.9% | 11,015 | 2,138  | 19.7% | 18.9%,<br>20.5% | 1.9%  |
| VT | 39  | 219   | 18.7% | 13.9%,<br>23.7% | 5,085  | 984    | 19.4% | 18.3%,<br>20.5% | 0.7%  |
| UT | 68  | 442   | 16.4% | 12.6%,<br>19.6% | 12,199 | 1,892  | 16.3% | 15.5%,<br>17%   | 0.2%  |
| WV | 23  | 154   | 14.5% | 8.6%,<br>20.2%  | 16,135 | 2,421  | 14.3% | 13.8%,<br>14.8% | 0.2%  |
| NM | 28  | 216   | 13.7% | 9.7%,<br>18.7%  | 12,603 | 1,479  | 13.7% | 13%,<br>14.4%   | 0%    |

NOTES: The bootstrap resampling method was performed to estimate the 95% CIs of adjusted rates. Two-sample t-tests were used to compare adjusted group means.  
\* $p < 0.05$ .

**Supplementary Table S3.** Adjusted rates of hospitalization before moving to a nursing home among residents with an ADRD diagnosis in assisted living and community (arrayed by absolute difference from largest to smallest)

| State | Number of assisted living residents who were hospitalized | Total number of assisted living residents with an ADRD diagnosis | Adjusted percent of assisted living residents who were hospitalized | 95% CI          | Number of community residents who were hospitalized | Total number of community residents | Adjusted percent of community residents who were hospitalized | 95% CI          | Absolute difference in adjusted hospitalization rate |
|-------|-----------------------------------------------------------|------------------------------------------------------------------|---------------------------------------------------------------------|-----------------|-----------------------------------------------------|-------------------------------------|---------------------------------------------------------------|-----------------|------------------------------------------------------|
| Total | 33,457                                                    | 88,867                                                           | 37.6%                                                               | 37.3%,<br>37.9% | 697,968                                             | 2,074,420                           | 33.6%                                                         | 33.5%,<br>33.7% | 4.0%*                                                |
| AR    | 299                                                       | 679                                                              | 44.8%                                                               | 40.7%,<br>49.2% | 9,638                                               | 28,484                              | 35.0%                                                         | 34.5%,<br>35.6% | 9.8%*                                                |
| RI    | 159                                                       | 371                                                              | 44.1%                                                               | 39.1%,<br>49.2% | 1,858                                               | 5,208                               | 35.9%                                                         | 34.5%,<br>37.2% | 8.2%*                                                |
| GA    | 680                                                       | 1,744                                                            | 39.9%                                                               | 37.9%,<br>41.9% | 19,740                                              | 61,278                              | 32.4%                                                         | 32%,<br>32.8%   | 7.5%*                                                |
| NV    | 184                                                       | 415                                                              | 43.7%                                                               | 38.9%,<br>49%   | 5,555                                               | 15,633                              | 36.2%                                                         | 35.4%,<br>36.7% | 7.5%*                                                |
| KY    | 282                                                       | 676                                                              | 41.7%                                                               | 37.8%,<br>44.9% | 11,787                                              | 32,295                              | 35.2%                                                         | 34.8%,<br>35.7% | 6.4%*                                                |
| CA    | 2,736                                                     | 7,413                                                            | 36.8%                                                               | 35.6%,<br>37.8% | 58,349                                              | 199,239                             | 30.5%                                                         | 30.3%,<br>30.7% | 6.3%*                                                |
| MA    | 1,100                                                     | 2,573                                                            | 43.4%                                                               | 41.4%,<br>45.1% | 18,452                                              | 50,024                              | 37.1%                                                         | 36.7%,<br>37.5% | 6.2%*                                                |
| CO    | 511                                                       | 1,490                                                            | 36.9%                                                               | 34.2%,<br>39.5% | 6,616                                               | 23,572                              | 30.8%                                                         | 30%,<br>31.4%   | 6.1%*                                                |
| WY    | 46                                                        | 119                                                              | 40.1%                                                               | 31.7%,<br>49%   | 1,140                                               | 3,738                               | 34.2%                                                         | 32.8%,<br>35.9% | 5.9%                                                 |
| NY    | 2,497                                                     | 5,816                                                            | 40.0%                                                               | 39%,<br>41.2%   | 43,032                                              | 123,532                             | 34.2%                                                         | 34%,<br>34.5%   | 5.8%*                                                |
| WA    | 1,036                                                     | 2,959                                                            | 37.8%                                                               | 35.6%,<br>39.5% | 12,551                                              | 42,984                              | 32.1%                                                         | 31.6%,<br>32.6% | 5.7%*                                                |
| FL    | 4,510                                                     | 10,438                                                           | 39.9%                                                               | 39%,<br>40.6%   | 58,793                                              | 161,341                             | 34.4%                                                         | 34.2%,<br>34.6% | 5.5%*                                                |
| IL    | 1,382                                                     | 3,481                                                            | 39.6%                                                               | 38%,<br>41.6%   | 31,288                                              | 89,570                              | 34.1%                                                         | 33.8%,<br>34.4% | 5.5%*                                                |



|    |       |       |       |                 |        |         |       |                 |       |
|----|-------|-------|-------|-----------------|--------|---------|-------|-----------------|-------|
| TX | 2,006 | 5,068 | 38.5% | 37.4%,<br>39.6% | 55,507 | 163,350 | 33.6% | 33.4%,<br>33.8% | 4.9%* |
| AL | 253   | 660   | 39.5% | 35.3%,<br>43.9% | 13,860 | 38,974  | 34.8% | 34.4%,<br>35.2% | 4.7%* |
| OK | 334   | 872   | 38.4% | 35.4%,<br>41.2% | 10,769 | 31,747  | 33.8% | 33.3%,<br>34.3% | 4.6%* |
| SC | 509   | 1,416 | 37.0% | 34.8%,<br>39.6% | 12,387 | 38,723  | 32.4% | 31.9%,<br>32.9% | 4.6%* |
| LA | 183   | 473   | 38.9% | 34.5%,<br>43.7% | 11,408 | 31,845  | 34.5% | 34%,<br>34.9%   | 4.4%  |
| ND | 102   | 301   | 37.2% | 31.1%,<br>41.9% | 1,116  | 3,726   | 32.8% | 31.3%,<br>34.3% | 4.4%  |
| TN | 609   | 1,505 | 40.4% | 37.7%,<br>43%   | 16,618 | 45,198  | 36.0% | 35.6%,<br>36.5% | 4.4%* |
| WI | 791   | 2,329 | 36.2% | 34.1%,<br>38.5% | 9,287  | 30,008  | 32.6% | 32.1%,<br>33.2% | 3.6%* |
| IA | 420   | 1,294 | 35.5% | 33%,<br>38.2%   | 5,909  | 19,771  | 32.1% | 31.5%,<br>32.8% | 3.4%* |
| MS | 205   | 539   | 39.9% | 35.9%,<br>44%   | 10,135 | 27,356  | 36.6% | 36%,<br>37.1%   | 3.3%  |
| OR | 455   | 1,430 | 34.2% | 31.9%,<br>36.8% | 5,673  | 20,002  | 30.9% | 30.2%,<br>31.7% | 3.3%* |
| MN | 613   | 1,832 | 36.5% | 34.5%,<br>39%   | 5,355  | 17,486  | 33.2% | 32.6%,<br>34.2% | 3.2%* |
| MO | 623   | 1,679 | 37.6% | 35.1%,<br>40%   | 14,645 | 42,199  | 34.4% | 34%,<br>34.8%   | 3.2%* |
| NC | 1,377 | 3,828 | 35.8% | 34.5%,<br>37.5% | 23,522 | 72,161  | 32.7% | 32.3%,<br>33%   | 3.1%* |
| DE | 106   | 300   | 36.8% | 30.8%,<br>42.1% | 3,176  | 9,228   | 33.8% | 32.9%,<br>34.8% | 3.0%  |
| MT | 110   | 334   | 35.8% | 29.6%,<br>41.1% | 2,099  | 7,080   | 32.9% | 31.7%,<br>34.1% | 3.0%  |
| NE | 377   | 1,126 | 36.2% | 33.3%,<br>38.9% | 4,068  | 13,277  | 33.2% | 32.4%,<br>34%   | 3.0%  |
| AZ | 578   | 1,742 | 33.4% | 31.3%,<br>35.9% | 10,012 | 34,179  | 30.6% | 30.2%,<br>31.1% | 2.8%* |

|    |       |       |       |                 |        |        |       |                 |       |
|----|-------|-------|-------|-----------------|--------|--------|-------|-----------------|-------|
| NH | 175   | 574   | 32.8% | 29.5%,<br>37.6% | 3,729  | 11,015 | 35.6% | 34.7%,<br>36.4% | 2.8%  |
| MI | 604   | 1,583 | 37.6% | 35.2%,<br>40%   | 30,904 | 82,213 | 35.0% | 34.7%,<br>35.3% | 2.6%  |
| WV | 60    | 154   | 37.7% | 30.3%,<br>45.3% | 5,967  | 16,135 | 35.1% | 34.4%,<br>35.6% | 2.6%  |
| VT | 62    | 219   | 31.6% | 25.6%,<br>37.5% | 1,590  | 5,085  | 34.1% | 32.7%,<br>35.3% | 2.5%  |
| PA | 2,010 | 5,225 | 38.5% | 37%,<br>39.6%   | 27,116 | 74,135 | 36.0% | 35.7%,<br>36.3% | 2.4%* |
| NM | 59    | 216   | 29.1% | 23.4%,<br>35.9% | 3,518  | 12,603 | 31.4% | 30.6%,<br>32.1% | 2.3%  |
| ID | 148   | 489   | 32.7% | 28.8%,<br>37.4% | 2,577  | 9,217  | 30.7% | 29.6%,<br>31.7% | 2.0%  |
| IN | 401   | 1,107 | 35.6% | 33.1%,<br>38.4% | 15,903 | 46,139 | 33.8% | 33.4%,<br>34.2% | 1.8%  |
| NJ | 1,141 | 3,190 | 34.7% | 33.1%,<br>36.3% | 25,125 | 74,728 | 32.9% | 32.6%,<br>33.2% | 1.8%  |
| KS | 327   | 902   | 36.0% | 32.9%,<br>38.5% | 7,693  | 23,009 | 34.6% | 33.9%,<br>35.2% | 1.4%  |
| MD | 615   | 1,998 | 31.7% | 29.8%,<br>33.9% | 16,905 | 51,126 | 33.2% | 32.8%,<br>33.5% | 1.4%  |
| SD | 89    | 287   | 33.8% | 28.3%,<br>39.1% | 1,398  | 4,346  | 35.2% | 34%,<br>36.5%   | 1.4%  |
| UT | 120   | 442   | 29.8% | 25.1%,<br>34.5% | 3,143  | 12,199 | 28.7% | 27.8%,<br>29.5% | 1.2%  |
| OH | 1,160 | 3,294 | 35.5% | 34%,<br>37.3%   | 23,725 | 67,225 | 34.4% | 34.1%,<br>34.7% | 1.1%  |
| VA | 1,036 | 3,090 | 35.0% | 33.3%,<br>37.2% | 21,079 | 62,860 | 34.2% | 33.8%,<br>34.5% | 0.9%  |
| ME | 253   | 825   | 31.6% | 27.7%,<br>35.2% | 3,396  | 10,982 | 31.9% | 31.2%,<br>32.8% | 0.3%  |
| CT | 124   | 372   | 35.0% | 30.2%,<br>39.9% | 9,855  | 28,195 | 35.1% | 34.5%,<br>35.6% | 0.1%  |

NOTES: The bootstrap resampling method was performed to estimate the 95% CIs of adjusted rates. Two-sample t-tests were used to compare adjusted group means.

\*p<0.05.
